# Supplementary material
Source: HighWire-hosted journal article supplement (doi:10.1101/rna.071621.119)
Supplement: Supplemental_Tables_.xlsx [file Supplemental_Tables_.xlsx]

## Sheet: Inventory
Supplemental Tables
Supplemental Table S1. List of Ago2, FHAgo1, and FHAgo2 cytoplasmic protein binding partners.
>> Excel Spreadsheet
Supplemental Table S2. Primers used in this study.
>> Excel Spreadsheet

## Sheet: TableS1
Supplemental Table S1. List of Ago2, FHAgo1, and FHAgo2 cytoplasmic protein binding partners.
					Peptides
No	Gene_description	ID	Weight	Ago2	FHAgo1	FHAgo2
87	mCG130432 [Mus musculus]	gi|148666881	15 kDa	0	2	2
98	PREDICTED: similar to methylenetetrahydrofolate dehydrogenase (NADP+ dependent) 1-like [Canis familiaris]	gi|73946132	100 kDa	0	0	2
111	methylenetetrahydrofolate dehydrogenase (NADP+ dependent) 1-like precursor [Mus musculus], gi|283135114|ref|NP_001164256.1| methylenetetrahydrofolate dehydrogenase (NADP+ dependent) 1-like precursor [Mus musculus], gi|283135118|ref|NP_001164257.1| methylenetetrahydrofolate dehydrogenase (NADP+ dependent) 1-like precursor [Mus musculus], gi|193806746|sp|Q3V3R1.2|C1TM_MOUSE RecName: Full=Monofuncti…	gi|283135110	106 kDa	0	0	2
113	hypothetical protein PANDA_017254 [Ailuropoda melanoleuca]	gi|281343268	98 kDa	0	0	2
120	PREDICTED: hypothetical protein [Mus musculus]	gi|149274546	19 kDa	0	0	2
130	unnamed protein product [Mus musculus]	gi|12846287	24 kDa	0	0	2
177	PREDICTED: similar to tubulin, alpha 1 [Canis familiaris]	gi|73960249	64 kDa	0	0	2
185	rCG38662, isoform CRA_c [Rattus norvegicus]	gi|149036087	17 kDa	0	0	2
189	chaperonin containing Tcp1, subunit 4 (delta) [Mus musculus], gi|549057|sp|P80315.3|TCPD_MOUSE RecName: Full=T-complex protein 1 subunit delta; Short=TCP-1-delta; AltName: Full=CCT-delta; AltName: Full=A45, gi|468548|emb|CAA83429.1| CCT (chaperonin containing TCP-1) delta subunit [Mus musculus], gi|5295929|dbj|BAA81875.1| chaperonin containing TCP-1 delta subunit [Mus musculus], gi|12846218|dbj|B…	gi|6753322	58 kDa	0	5	2
199	small nuclear ribonucleoprotein D2 isoform 1 [Homo sapiens], gi|58037145|ref|NP_081219.1| small nuclear ribonucleoprotein D2 [Mus musculus], gi|77735903|ref|NP_001029648.1| small nuclear ribonucleoprotein D2 [Bos taurus], gi|157820925|ref|NP_001102869.1| small nuclear ribonucleoprotein D2 polypeptide [Rattus norvegicus], gi|55649427|ref|XP_512755.1| PREDICTED: small nuclear ribonucleoprotein poly…	gi|4759158	14 kDa	0	3	2
200	type II keratin subunit protein [Mus musculus]	gi|4159806	65 kDa	0	0	2
212	unnamed protein product [Mus musculus]	gi|74138855	127 kDa	0	4	2
224	mCG141545, isoform CRA_b [Mus musculus]	gi|148679578	69 kDa	0	5	2
226	tyrosine 3/tryptophan 5 -monooxygenase activation protein, epsilon polypeptide [Homo sapiens], gi|27806197|ref|NP_776916.1| tyrosine 3-monooxygenase/tryptophan 5-monooxygenase activation protein, epsilon polypeptide [Bos taurus], gi|55741616|ref|NP_001006219.1| tyrosine 3-monooxygenase/tryptophan 5-monooxygenase activation protein, epsilon polypeptide [Gallus gallus], gi|226874906|ref|NP_033562.3…	gi|5803225	29 kDa	0	4	2
230	mCG14769 [Mus musculus]	gi|148698953	94 kDa	0	3	2
231	unnamed protein product [Mus musculus], gi|30721855|gb|AAP34198.1| cytosolic PGE synthase [Mus musculus]	gi|12843224	19 kDa	0	2	2
234	MOB1, Mps One Binder kinase activator-like 1B (yeast), isoform CRA_b [Mus musculus]	gi|148666661	29 kDa	0	0	2
237	DNA binding protein [Canis familiaris]	gi|5441543	11 kDa	0	0	2
263	proteasome (prosome, macropain) subunit, alpha type 6, isoform CRA_a [Mus musculus]	gi|148704780	16 kDa	0	0	2
266	tyrosine 3-monooxygenase/tryptophan 5-monooxygenase activation protein, zeta polypeptide, isoform CRA_b [Mus musculus]	gi|148676868	29 kDa	0	6	2
274	mCG15599, isoform CRA_e [Mus musculus]	gi|148706646	55 kDa	0	2	2
277	PREDICTED: similar to tropomyosin 3 isoform 1 [Equus caballus], gi|54912|emb|CAA37782.1| unnamed protein product [Mus musculus], gi|26353040|dbj|BAC40150.1| unnamed protein product [Mus musculus], gi|26354026|dbj|BAC40643.1| unnamed protein product [Mus musculus], gi|62027399|gb|AAH92045.1| Tpm3 protein [Mus musculus], gi|74138917|dbj|BAE27258.1| unnamed protein product [Mus musculus], gi|7413949…	gi|149751320	29 kDa	0	2	2
279	PREDICTED: 60S ribosomal protein L7a-like [Pongo abelii]	gi|297674820	23 kDa	0	2	2
280	Sjogren syndrome antigen B, isoform CRA_b [Mus musculus]	gi|148695104	49 kDa	0	2	2
286	PREDICTED: similar to mKIAA0850 protein isoform 1 [Monodelphis domestica]	gi|126306338	72 kDa	0	0	2
287	unnamed protein product [Mus musculus]	gi|74223783	50 kDa	0	2	2
290	PREDICTED: similar to proliferating cell nuclear antigen (DNA polymerase delta auxiliary protein) isoform 1 [Mus musculus], gi|148709381|gb|EDL41327.1| mCG118515 [Mus musculus]	gi|149270621	29 kDa	0	4	2
299	Y box binding protein 1 [Cavia porcellus]	gi|290543326	36 kDa	0	0	2
300	unnamed protein product [Mus musculus]	gi|26330019	36 kDa	0	3	2
304	eukaryotic translation initiation factor 3, subunit G [Mus musculus], gi|23503073|sp|Q9Z1D1.2|EIF3G_MOUSE RecName: Full=Eukaryotic translation initiation factor 3 subunit G; Short=eIF3g; AltName: Full=Eukaryotic translation initiation factor 3 subunit 4; AltName: Full=eIF-3-delta; AltName: Full=Eukaryotic translation initiation factor 3 RNA-binding subunit; Short=eIF-3 RNA-binding subunit; AltNam…	gi|31980808	36 kDa	0	0	2
311	unnamed protein product [Mus musculus]	gi|12848428	29 kDa	0	0	2
314	proteasome alpha 5 subunit [Mus musculus], gi|23110942|ref|NP_002781.2| proteasome alpha 5 subunit [Homo sapiens], gi|62751982|ref|NP_001015566.1| proteasome alpha 5 subunit [Bos taurus], gi|222136590|ref|NP_001138373.1| proteasome alpha 5 subunit [Sus scrofa], gi|73959335|ref|XP_547244.2| PREDICTED: similar to Proteasome subunit alpha type 5 (Proteasome zeta chain) (Macropain zeta chain) (Multic…	gi|7106387	26 kDa	0	2	2
322	mitogen-activated protein kinase kinase kinase 7 interacting protein 1 [Mus musculus]	gi|148672665	54 kDa	0	0	2
326	RecName: Full=Serine/arginine repetitive matrix protein 2	gi|114152161	295 kDa	0	0	2
327	proteasome alpha 4 subunit [Mus musculus], gi|9910830|sp|Q9R1P0.1|PSA4_MOUSE RecName: Full=Proteasome subunit alpha type-4; AltName: Full=Proteasome component C9; AltName: Full=Macropain subunit C9; AltName: Full=Multicatalytic endopeptidase complex subunit C9; AltName: Full=Proteasome subunit L, gi|5757663|gb|AAD50538.1|AF060093_1 proteasome subunit C9 [Mus musculus], gi|12805051|gb|AAH01982.1| …	gi|6755196	29 kDa	0	2	2
328	myosin I [Mus musculus]	gi|200009	125 kDa	0	0	2
329	mCG7879, isoform CRA_a [Mus musculus]	gi|148702066	29 kDa	0	3	2
336	unnamed protein product [Mus musculus]	gi|26347143	19 kDa	0	2	2
341	RIKEN cDNA 5830482F20, isoform CRA_a [Mus musculus]	gi|148692163	65 kDa	0	0	2
347	potassium channel tetramerisation domain containing 5 [Mus musculus], gi|74150666|dbj|BAE25476.1| unnamed protein product [Mus musculus]	gi|239735501	26 kDa	0	0	2
359	interleukin enhancer binding factor 2 [Mus musculus], gi|24234747|ref|NP_004506.2| interleukin enhancer binding factor 2 [Homo sapiens], gi|207079937|ref|NP_001128737.1| DKFZP469C1132 protein [Pongo abelii], gi|57089135|ref|XP_537263.1| PREDICTED: similar to interleukin enhancer binding factor 2 isoform 1 [Canis familiaris], gi|109016398|ref|XP_001111422.1| PREDICTED: similar to interleukin enhan…	gi|13385872	43 kDa	0	0	2
361	hypothetical protein LOC68045 [Mus musculus], gi|20137942|sp|Q9CQE8.1|CN166_MOUSE RecName: Full=UPF0568 protein C14orf166 homolog, gi|12834580|dbj|BAB22966.1| unnamed protein product [Mus musculus], gi|12849219|dbj|BAB28255.1| unnamed protein product [Mus musculus], gi|12849263|dbj|BAB28273.1| unnamed protein product [Mus musculus], gi|29387285|gb|AAH48357.1| RIKEN cDNA 2700060E02 gene [Mus muscu…	gi|13386026	28 kDa	0	2	2
364	beta-actin [Oryctolagus cuniculus]	gi|15553463	8 kDa	0	0	2
366	heterogeneous nuclear ribonucleoprotein A3 [Mus musculus]	gi|123123581	34 kDa	0	3	2
369	glycoprotein gC1qBP [Rattus norvegicus]	gi|2330657	31 kDa	0	0	2
371	unnamed protein product [Mus musculus], gi|148678798|gb|EDL10745.1| RIKEN cDNA 1110033J19 [Mus musculus], gi|187466321|emb|CAQ51813.1| ribosomal protein S4, Y-linked 2 [Mus musculus]	gi|74205095	29 kDa	0	0	2
378	PREDICTED: similar to heterogeneous nuclear ribonucleoprotein R [Pan troglodytes]	gi|114554622	82 kDa	0	3	2
381	splicing factor, arginine/serine-rich 1 isoform 2 [Mus musculus], gi|26347437|dbj|BAC37367.1| unnamed protein product [Mus musculus]	gi|118582271	22 kDa	0	0	2
390	splicing factor, arginine/serine-rich 7, 35kDa, isoform CRA_a [Homo sapiens], gi|148706558|gb|EDL38505.1| mCG17902, isoform CRA_d [Mus musculus], gi|149050600|gb|EDM02773.1| rCG61762, isoform CRA_b [Rattus norvegicus]	gi|119620768	16 kDa	0	0	2
394	eukaryotic translation initiation factor 4A, isoform 3 [Mus musculus], gi|42560197|sp|Q91VC3.3|IF4A3_MOUSE RecName: Full=Eukaryotic initiation factor 4A-III; AltName: Full=Eukaryotic translation initiation factor 4A isoform 3; AltName: Full=ATP-dependent RNA helicase eIF4A-3; AltName: Full=ATP-dependent RNA helicase DDX48; AltName: Full=DEAD box protein 48, gi|14198152|gb|AAH08132.1| Eukaryotic t…	gi|20149756	47 kDa	0	0	2
395	ribosomal protein L10-like [Mus musculus], gi|27664676|ref|XP_234245.1| PREDICTED: similar to ribosomal protein L10 [Rattus norvegicus], gi|109479462|ref|XP_001080201.1| PREDICTED: similar to ribosomal protein L10 [Rattus norvegicus], gi|215274769|sp|P86048.1|RL10L_MOUSE RecName: Full=60S ribosomal protein L10-like, gi|148704692|gb|EDL36639.1| mCG50176 [Mus musculus]	gi|242397462	25 kDa	0	0	2
401	DEAH (Asp-Glu-Ala-His) box polypeptide 15 isoform 2 [Mus musculus], gi|31563436|sp|O35286.2|DHX15_MOUSE RecName: Full=Putative pre-mRNA-splicing factor ATP-dependent RNA helicase DHX15; AltName: Full=DEAH box protein 15, gi|74219352|dbj|BAE26805.1| unnamed protein product [Mus musculus], gi|148705703|gb|EDL37650.1| DEAH (Asp-Glu-Ala-His) box polypeptide 15, isoform CRA_a [Mus musculus]	gi|110835723	91 kDa	0	0	2
406	PR264/SC35 [Mus musculus]	gi|1405747	14 kDa	0	0	2
412	mitochondrial ribosomal protein S24 precursor [Mus musculus], gi|81880396|sp|Q9CQV5.1|RT24_MOUSE RecName: Full=28S ribosomal protein S24, mitochondrial; Short=S24mt; Short=MRP-S24; Flags: Precursor, gi|12833576|dbj|BAB22577.1| unnamed protein product [Mus musculus], gi|12846143|dbj|BAB27047.1| unnamed protein product [Mus musculus], gi|12851757|dbj|BAB29155.1| unnamed protein product [Mus musculu…	gi|13385578	19 kDa	0	0	2
417	Fam120a protein [Mus musculus]	gi|118600914	104 kDa	0	0	2
13	eukaryotic translation initiation factor 2C, 1 [Homo sapiens], gi|251823852|ref|NP_700452.2| eukaryotic translation initiation factor 2C, 1 [Mus musculus], gi|114555500|ref|XP_513312.2| PREDICTED: eukaryotic translation initiation factor 2C, 1 isoform 4 [Pan troglodytes], gi|88984241|sp|Q9UL18.3|AGO1_HUMAN RecName: Full=Protein argonaute-1; AltName: Full=Argonaute1; Short=hAgo1; AltName: Full=Euk…	gi|6912352	97 kDa	0	35	3
165	mCG15301, isoform CRA_f [Mus musculus]	gi|148675005	14 kDa	0	3	3
191	proteasome 26S non-ATPase subunit 5 [Mus musculus], gi|52783230|sp|Q8BJY1.4|PSMD5_MOUSE RecName: Full=26S proteasome non-ATPase regulatory subunit 5; AltName: Full=26S proteasome subunit S5B; AltName: Full=26S protease subunit S5 basic, gi|26328757|dbj|BAC28117.1| unnamed protein product [Mus musculus], gi|74201679|dbj|BAE28457.1| unnamed protein product [Mus musculus], gi|74211603|dbj|BAE26526.1…	gi|134053913	56 kDa	0	5	3
209	t-complex protein 1 [Mus musculus], gi|1729865|sp|P11983.3|TCPA2_MOUSE RecName: Full=T-complex protein 1 subunit alpha B; Short=TCP-1-alpha; AltName: Full=CCT-alpha; AltName: Full=Tailless complex polypeptide 1B; Short=TCP-1-B, gi|258450|gb|AAB23855.1| t-complex polypeptide 1 [Mus sp.], gi|475019|dbj|BAA01461.1| t-complex polypeptide 1 [Mus musculus], gi|13277861|gb|AAH03809.1| T-complex protein …	gi|110625624	60 kDa	0	5	3
236	ribosomal protein, large, P1 [Mus musculus], gi|1350781|sp|P47955.1|RLA1_MOUSE RecName: Full=60S acidic ribosomal protein P1, gi|902558|gb|AAA70106.1| acidic ribosomal phosphoprotein P1 [Mus musculus], gi|12841638|dbj|BAB25292.1| unnamed protein product [Mus musculus], gi|12846257|dbj|BAB27095.1| unnamed protein product [Mus musculus], gi|26352996|dbj|BAC40128.1| unnamed protein product [Mus musc…	gi|9256519	11 kDa	0	3	3
265	PREDICTED: DEAD box polypeptide 17 [Oryctolagus cuniculus].	gi|291389880	92 kDa	0	3	3
269	component C5 of proteasome [Mus musculus]	gi|1165123	25 kDa	0	3	3
276	Dhx30 protein [Mus musculus]	gi|13278588	104 kDa	0	3	3
284	mKIAA0098 protein [Mus musculus]	gi|37359776	60 kDa	0	2	3
338	unnamed protein product [Mus musculus]	gi|1334114	32 kDa	0	0	3
340	RAN binding protein 10 [Mus musculus], gi|161777491|gb|ABX79150.1| Ran binding protein 10 [Mus musculus]	gi|148679367	67 kDa	0	0	3
344	RAB5C, member RAS oncogene family [Mus musculus], gi|38258917|sp|P35278.2|RAB5C_MOUSE RecName: Full=Ras-related protein Rab-5C, gi|18606182|gb|AAH23027.1| RAB5C, member RAS oncogene family [Mus musculus], gi|20988213|gb|AAH29678.1| RAB5C, member RAS oncogene family [Mus musculus], gi|74186351|dbj|BAE42948.1| unnamed protein product [Mus musculus], gi|74195703|dbj|BAE39656.1| unnamed protein produ…	gi|113866024	23 kDa	0	0	3
379	poly(rC)-binding protein 2 isoform 4 [Mus musculus].	gi|291327528	34 kDa	0	0	3
383	Rho guanine nucleotide exchange factor (GEF) 10 isoform b [Mus musculus]	gi|111378383	143 kDa	0	0	3
389	RB1-inducible coiled-coil 1 [Mus musculus]	gi|148682314	182 kDa	0	0	3
147	serine/threonine kinase 38 like [Mus musculus], gi|26342512|dbj|BAC34918.1| unnamed protein product [Mus musculus], gi|29169341|gb|AAO66474.1| putative serine/threonine kinase NDRB [Mus musculus], gi|148678768|gb|EDL10715.1| mCG15023 [Mus musculus], gi|187466532|emb|CAQ51943.1| serine/threonine kinase 38 like [Mus musculus]	gi|27370078	54 kDa	0	2	4
195	chaperonin subunit 8 (theta) [Mus musculus], gi|1174621|sp|P42932.3|TCPQ_MOUSE RecName: Full=T-complex protein 1 subunit theta; Short=TCP-1-theta; AltName: Full=CCT-theta, gi|695625|emb|CAA85521.1| CCTtheta, theta subunit of the chaperonin containing TCP-1 (CCT) [Mus musculus], gi|14290480|gb|AAH09007.1| Chaperonin containing Tcp1, subunit 8 (theta) [Mus musculus], gi|74150990|dbj|BAE27627.1| unn…	gi|126723461	60 kDa	0	6	4
241	ribophorin II [Mus musculus]	gi|123297068	68 kDa	0	2	4
253	RuvB-like protein 2 [Mus musculus], gi|149757860|ref|XP_001490235.1| PREDICTED: similar to DNA helicase isoform 1 [Equus caballus], gi|30316329|sp|Q9WTM5.3|RUVB2_MOUSE RecName: Full=RuvB-like 2; AltName: Full=p47 protein, gi|4521249|dbj|BAA76297.1| DNA helicase [Mus musculus], gi|74184418|dbj|BAE25736.1| unnamed protein product [Mus musculus], gi|74186746|dbj|BAE34828.1| unnamed protein product […	gi|6755382	51 kDa	0	2	4
270	coatomer protein complex subunit alpha, isoform CRA_a [Mus musculus]	gi|148707095	138 kDa	0	3	4
288	insulin-like growth factor 2 mRNA binding protein 2 [Mus musculus], gi|81889459|sp|Q5SF07.1|IF2B2_MOUSE RecName: Full=Insulin-like growth factor 2 mRNA-binding protein 2; Short=IGF2 mRNA-binding protein 2; Short=IMP-2; AltName: Full=IGF-II mRNA-binding protein 2; AltName: Full=VICKZ family member 2, gi|46577878|gb|AAT01428.1| insulin-like growth factor 2 mRNA-binding protein 2 [Mus musculus], gi|…	gi|145207996	66 kDa	0	0	4
70	mCG1028606 [Mus musculus]	gi|148671055	21 kDa	0	4	5
84	trinucleotide repeat containing 6b, isoform CRA_a [Mus musculus]	gi|148672646	193 kDa	0	7	6
108	tripartite motif protein 28 [Mus musculus]	gi|148706135	89 kDa	0	9	6
163	FK506 binding protein 5 [Mus musculus], gi|2499775|sp|Q64378.1|FKBP5_MOUSE RecName: Full=FK506-binding protein 5; AltName: Full=Peptidyl-prolyl cis-trans isomerase; Short=PPIase; Short=Rotamase; AltName: Full=51 kDa FK506-binding protein; AltName: Full=FKBP-51, gi|915280|gb|AAA86983.1| FKBP51 [Mus musculus], gi|1020307|gb|AAA89162.1| FK506 binding protein 51 [Mus musculus], gi|15929657|gb|AAH1526…	gi|6753884	51 kDa	0	4	6
210	mCG13192, isoform CRA_a [Mus musculus]	gi|148673963	45 kDa	0	4	8
71	heat shock protein 1, alpha [Mus musculus], gi|1170384|sp|P07901.4|HS90A_MOUSE RecName: Full=Heat shock protein HSP 90-alpha; AltName: Full=HSP 86; AltName: Full=Tumor-specific transplantation 86 kDa antigen; Short=TSTA, gi|309318|gb|AAA53068.1| heat shock protein 86 [Mus musculus], gi|12835987|dbj|BAB23449.1| unnamed protein product [Mus musculus], gi|28436908|gb|AAH46614.1| Heat shock protein 9…	gi|6754254	85 kDa	0	13	10
97	nonsense mRNA reducing factor 1 NORF1 [Mus musculus]	gi|12836885	123 kDa	0	10	14
19	argonaute 2 isoform 1 [Homo sapiens], gi|229463006|sp|Q9UKV8.3|AGO2_HUMAN RecName: Full=Protein argonaute-2; AltName: Full=Argonaute2; Short=hAgo2; AltName: Full=Protein slicer; AltName: Full=PAZ Piwi domain protein; Short=PPD; AltName: Full=Eukaryotic translation initiation factor 2C 2; Short=eIF-2C 2; Short=eIF2C 2, gi|182888339|gb|AAI60104.1| Eukaryotic translation initiation factor 2C, 2 [syn…		97 kDa	0	0	24

## Sheet: TableS2
Supplemental Table S2. Primers used in this study.
3'UTR cloning
mouse-Lefty1-F	ccgctcgagAatcgatGCGCGGGGTGTGGCTTCCCCAA
mouse-Lefty1-R	ataagaatgcggccgcgtcgacACAAAACAAAGCATATTTTATTCAC
mouse-Cdkn1a-F	ccgctcgagAatcgatAGTGCCCACGGGAGCCCCGCCCTCTTC
mouse-Cdkn1a-R	ataagaatgcggccgcgtcgacAATCATCGAGAAGTATTTATTGAGCACC
mouse-Gnb5-F	ccgctcgagAATCGATTCTTCTGACAGCGTTCAAGAATG
mouse-Gnb5-R	ataagaatgcggccgcgtcgacTTGAAAAAAGATAATTTTACC
mouse-Csnk1a1-F	ccgctcgagAatcgatGCATGAATTGTGGAAGAGAAGC
mouse-Csnk1a1-R	ataagaatgcggccgcgtcgacACAGTTTTATTTTACACAAAC
mouse-Eif4b-F	ccgctcgagAATCGATGACCTCCGCACCCTGTGCTTTCTC
mouse-Eif4b-R	ataagaatgcggccgcgtcgacTCAACTTTAAAGACTGGATTTATTTGG
mouse-Rab5c-F	ccgctcgagAatcgatGCCCCCTTACCTGCCACTGCCCCCAC
mouse-Rab5c-R	ataagaatgcggccgcGTCGACCAGGTTGCATATCCTTTAATG
mouse-Txnip-F	ccgctcgagAATCGATGCCTGCAGGAAATGAAGCATC
mouse-Txnip-R	ataagaatgcggccgcgtcgacTAGACAAGAAAAGAACATTTATTTTTGTC
mouse-Snx5-F	ccgctcgagAATCGATCCTGTCTACTCTGAAGGACACC
mouse-Snx5-R	ataagaatgcggccgcgtcgacTTTGTTGTGAAATCTTTTCT
mouse-E2f5-F	ccgctcgagAATCGATATTCCATGGAAACTTGGGAC
mouse-E2f5-R	ataagaatgcggccgcgtcgacTAAAGTCAATGTTTCATACAAC
